# Supplementary material
Source: PubMed Central journal article supplement (PMC5700345)
Supplement: AAC.01440-17_zac012176717s1.pdf [file AAC.01440-17_zac012176717s1.pdf]

**Table S1. Antibiotic susceptibility<sup>a</sup> results for pediatric carbapenem-susceptible *Enterobacteriaceae* isolates (n=126)**

| <b>Antibiotic</b> | <b>Number of isolates tested</b> | <b>Susceptible n (%)</b> | <b>Intermediate n (%)</b> | <b>Resistant n (%)</b> |
|-------------------|----------------------------------|--------------------------|---------------------------|------------------------|
| Ceftriaxone       | 116                              | 101 (87)                 | 0                         | 15 (13)                |
| Cefepime          | 126                              | 118 (94)                 | 0                         | 8 (6)                  |
| Gentamicin        | 124                              | 116 (94)                 | 0                         | 8 (6)                  |
| Tobramycin        | 107                              | 95 (89)                  | 6 (6)                     | 6 (6)                  |
| Amikacin          | 125                              | 125 (100)                | 0                         | 0                      |
| Ciprofloxacin     | 126                              | 113 (90)                 | 0                         | 13 (10)                |
| Ertapenem         | 65                               | 63 (97)                  | 2 (3)                     | 0                      |
| Meropenem         | 112                              | 112 (100)                | 0                         | 0                      |
| Imipenem          | 39                               | 38 (97)                  | 1 (3)                     | 0                      |

<sup>a</sup> Susceptibilities are based on 2017 CLSI breakpoints
